# Supplementary material
Source: PubMed Central journal article supplement (PMC7719588)
Supplement: NIHMS1604133-supplement-1.pdf [file NIHMS1604133-supplement-1.pdf]

# Electronic Health Record Use in Ophthalmology

Please complete the survey below.

Thank you!

- 
- 1) Institution  UC San Diego  
 UC Irvine  
 UCLA  
 UC Davis  
 UCSF
- 
- 2) Affiliation  Ophthalmology Department  
 Health Information Technology
- 
- 3) In which year did your institution implement an EHR (of any kind) for ophthalmology in the outpatient clinic setting? \_\_\_\_\_
- 
- 4) In which year did your institution implement the current EHR for ophthalmology in the outpatient clinic setting? \_\_\_\_\_
- 
- 5) Does your institution use the ophthalmology-specific module, Epic Kaleidoscope?  Yes  
 No
- 
- 6) Did your institution have physician champions in ophthalmology during prior EHR implementations or transitions?  Yes  
 No
- 
- 7) Are there currently ophthalmologist(s) at your institution who are identified as formal liaisons between the department of ophthalmology and health information technology services?  Yes  
 No
- 
- 8) Did your institution conduct workflow mapping before prior EHR implementations or transitions in ophthalmology?  Yes  
 No
- 
- 9) Does your institution conduct formal EHR training sessions for all new ophthalmology faculty?  Yes  
 No
- 
- 10) Does your institution conduct formal EHR training sessions for all new ophthalmology trainees?  Yes  
 No
- 
- 11) Does your institution conduct informational sessions or presentations with the ophthalmology department before EHR upgrades?  Yes  
 No
- 
- 12) Does your institution offer opportunities for specialized training in EHR customization or personalization for ophthalmologists?  Yes  
 No

---

13) How would you rate the satisfaction of physicians in the ophthalmology department with your institution's EHR?

- Extremely Satisfied
- Moderately Satisfied
- Slightly Satisfied
- Neutral
- Slightly Dissatisfied
- Moderately Dissatisfied
- Extremely Dissatisfied

---

14) Please comment on any institutional factors that you believe may influence physician efficiency when using the EHR.

---

---

15) Please describe any unique challenges or lessons learned from prior EHR implementations or transitions at your institution, specifically relating to ophthalmology.

---
