# Supplementary material
Source: PubMed Central journal article supplement (PMC7719588)
Supplement: NIHMS1604133-supplement-2.pdf [file NIHMS1604133-supplement-2.pdf]

**Table S1. Association of factors with time spent in the electronic health record (EHR) system outside scheduled hours.**

| <b>Factor</b>                                                   | <b>Coefficient</b> | <b>P-value<sup>a</sup></b> |
|-----------------------------------------------------------------|--------------------|----------------------------|
| <b>Timing Metrics</b>                                           |                    |                            |
| Time in In-Basket per day                                       | +1.49              | <0.001                     |
| Time in Clinical Review per appointment                         | -0.75              | 0.16                       |
| Time in Orders per appointment                                  | +2.39              | 0.01                       |
| Time in Notes per appointment                                   | +1.82              | <0.001                     |
| <b>Practice Characteristics</b>                                 |                    |                            |
| Clinical Volume (appointments per day)                          | +0.51              | <0.001                     |
| Average age of patients seen                                    | -0.09              | 0.29                       |
| Average number of problems on the problem list of patients seen | -0.47              | 0.11                       |
| User's months of experience with EHR vendor                     | +0.01              | 0.26                       |
| Percent orders with team contributions                          | -0.02              | 0.33                       |
| <b>Personalization Features/EHR Vendor Efficiency Tools</b>     |                    |                            |
| Number of User-Level Preference List entries                    | -0.02              | 0.47                       |
| Chart Search                                                    | +2.90              | 0.03                       |
| Note Speed Buttons                                              | +1.48              | 0.01                       |
| Notewriter Macros created                                       | -0.14              | 0.97                       |
| Number of note templates created                                | +0.01              | 0.67                       |
| <b>Mobile Client Functionality</b>                              |                    |                            |
| In-Basket messages                                              | -1.39              | 0.22                       |
| Medication orders                                               | -13.40             | <0.001                     |
| Notes                                                           | +0.18              | 0.95                       |
| <b>Documentation Features</b>                                   |                    |                            |
| Progress note length <sup>b</sup>                               | +0.003             | <0.001                     |
| Documentation length <sup>c</sup>                               | -0.002             | 0.18                       |

<sup>a</sup>P-values derived from a linear mixed effects model with ophthalmologists and institutions designated as nested random effects. Statistical significance defined as  $p < 0.05$ .

<sup>b</sup>Progress note length defined by the average number of characters per progress note written by the provider during the reporting period.

<sup>c</sup>Documentation length defined by the average number of characters per note written by the provider during the reporting period.
